# Supplementary material
Source: PubMed Central journal article supplement (PMC7450110)
Supplement: supp_RA120.013348_159319_3_supp_550338_qc4llf.pdf [file supp_RA120.013348_159319_3_supp_550338_qc4llf.pdf]

Supporting information

**Polycomb proteins, Ezh1 and Ezh2, co-regulate chromatin accessibility and nephron progenitor cell lifespan**

Hongbing Liu, Sylvia Hilliard, Elizabeth Kelly, Chao-Hui Chen, Zubaida Saifudeen, and Samir S. El-Dahr

List of Material included:  
Supplemental figures S1-S7

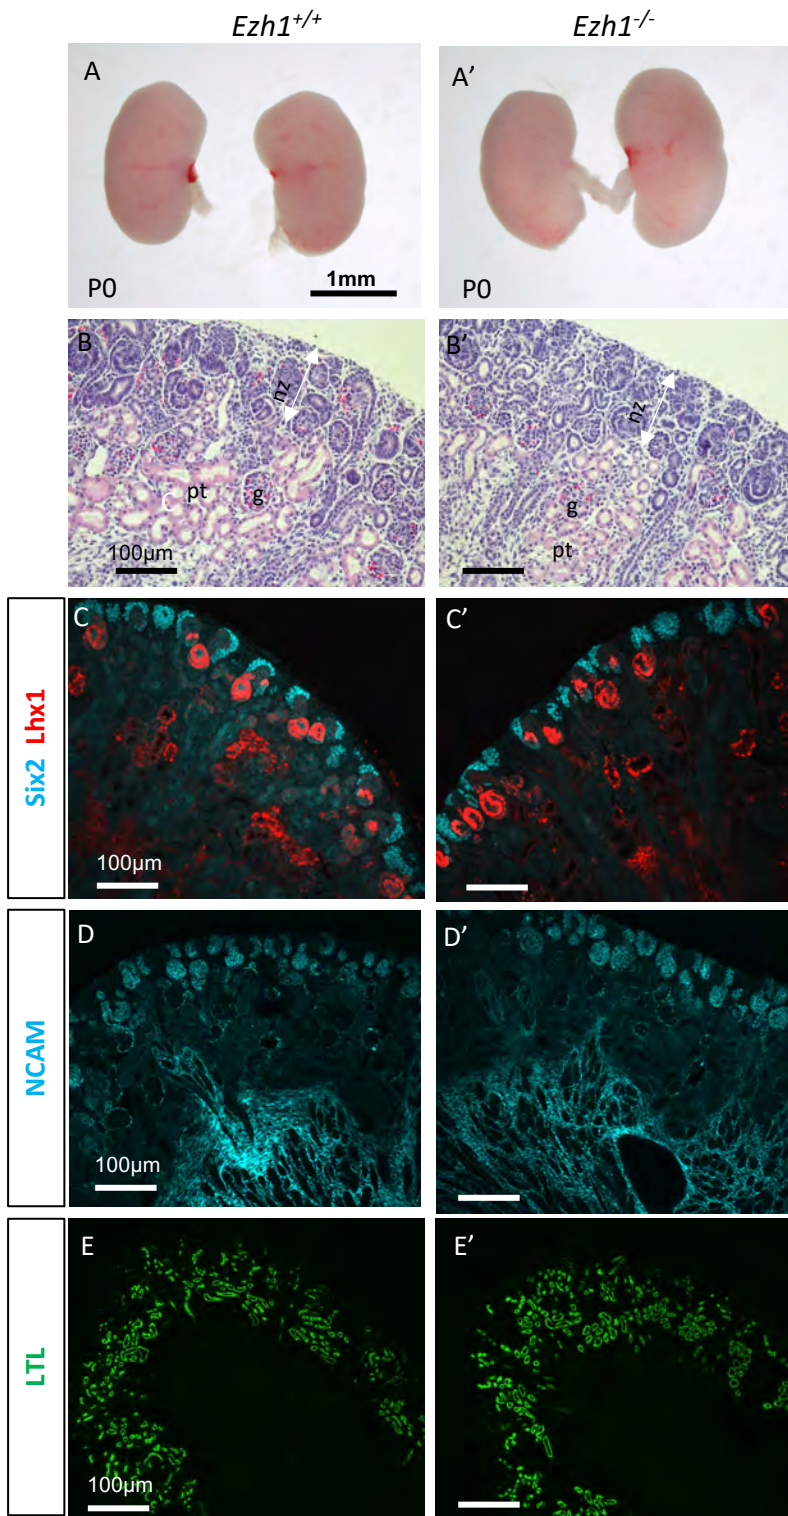

**Supplemental Fig. 1 (S-1). Germline *Ezh1*<sup>-/-</sup> mice have normal nephrogenesis.** (A-B') Gross view and histological H&E-stained sections. nz: nephrogenic zone, pt: proximal tubules, g: glomerulus. Section immunofluorescence using antibodies to Six2 and Lhx1 to label NPCs and nascent nephrons, respectively (C, C'); anti-neural cell adhesion molecule (NCAM) to label induced nephrons (D,D'); Note: NCAM also labels the medullary stroma; and staining for Lotus tetragonolobus lectin (LTL) to label the brush border of the proximal tubules (E,E').

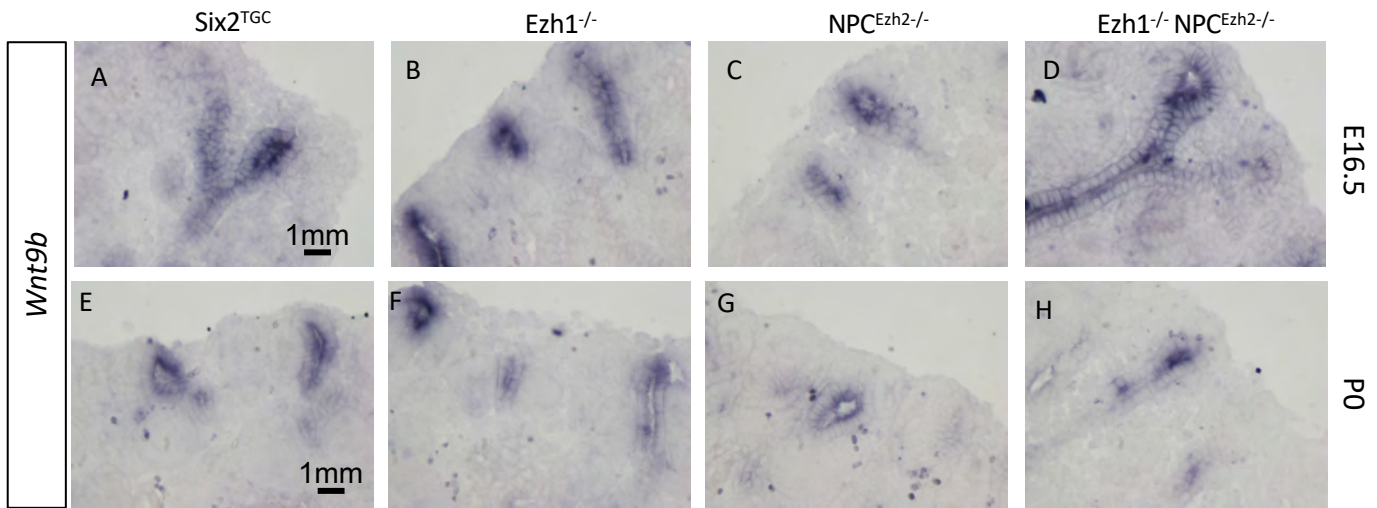

**Supplemental Fig. 2 (Fig. S-2). Inactivation of Ezh1 and Ezh2 in NPCs has no effect on *Wnt9b* expression in the adjacent ureteric bud branches.** Section ISH reveals UB-restricted expression of *Wnt9b* in all groups.

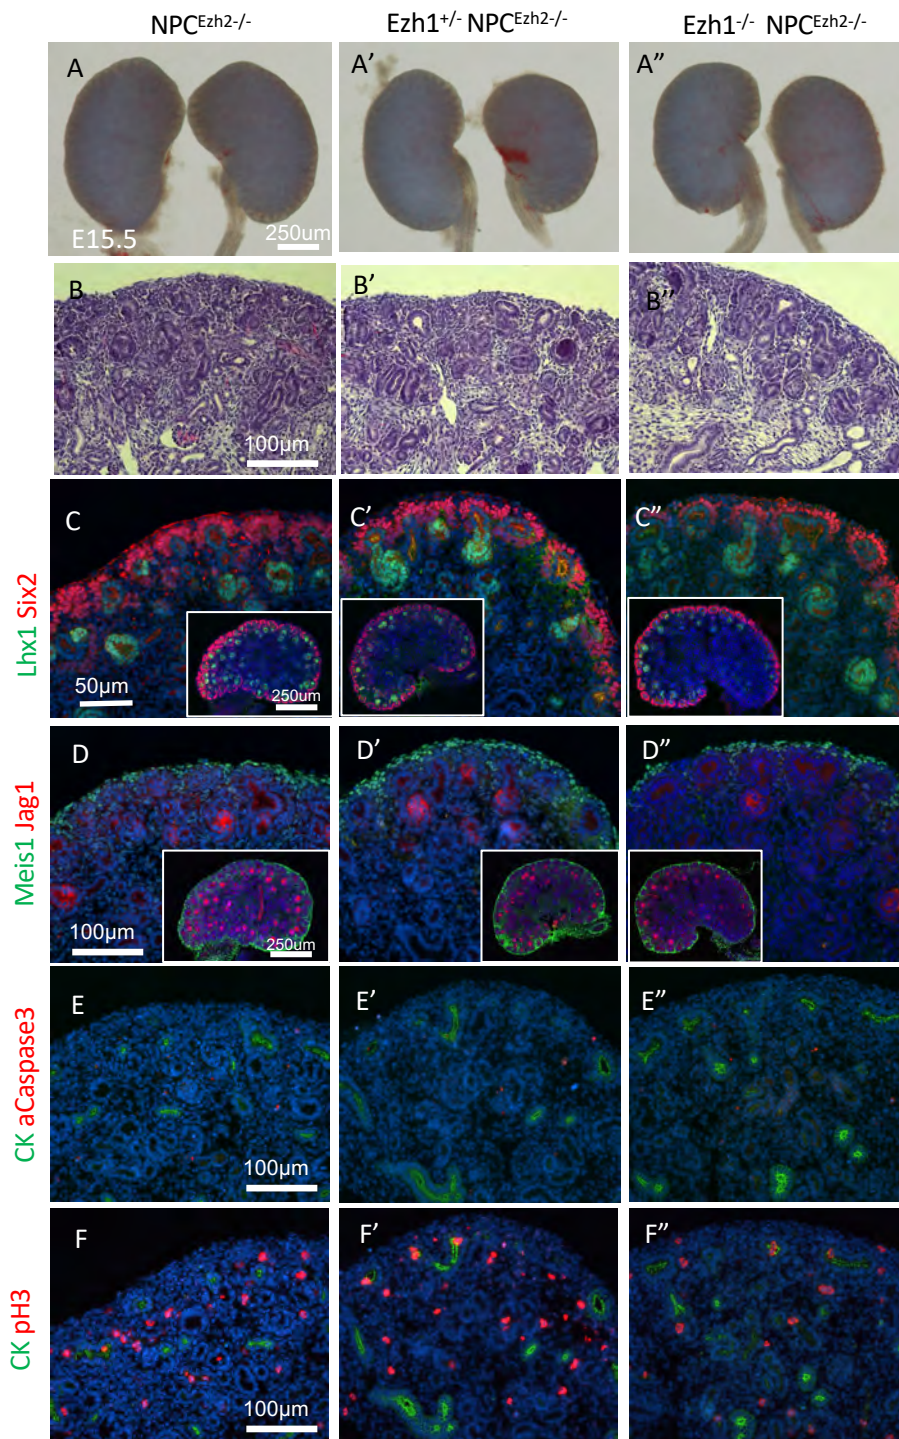

**Supplemental Fig. 3 (Fig. S-3). Effect of Ezh1 and Ezh2 inactivation on nephrogenesis at E15.5.** (A-A'') Gross morphology. (B-B'') Section H&E. (C-C'') Six2<sup>+</sup> cap mesenchyme is thinner and there are fewer Lhx1<sup>+</sup> nascent nephrons in Ezh1/2 double mutant kidneys (inset). (D-D'') There are fewer Jag1-expressing nascent nephrons (inset). (E-E'') Active Caspase-3 staining (marker of apoptosis) is not altered across genotypes. (F-F'') Phospho-S10-H3 staining, a marker of dividing cells, is decreased in double mutant kidneys.

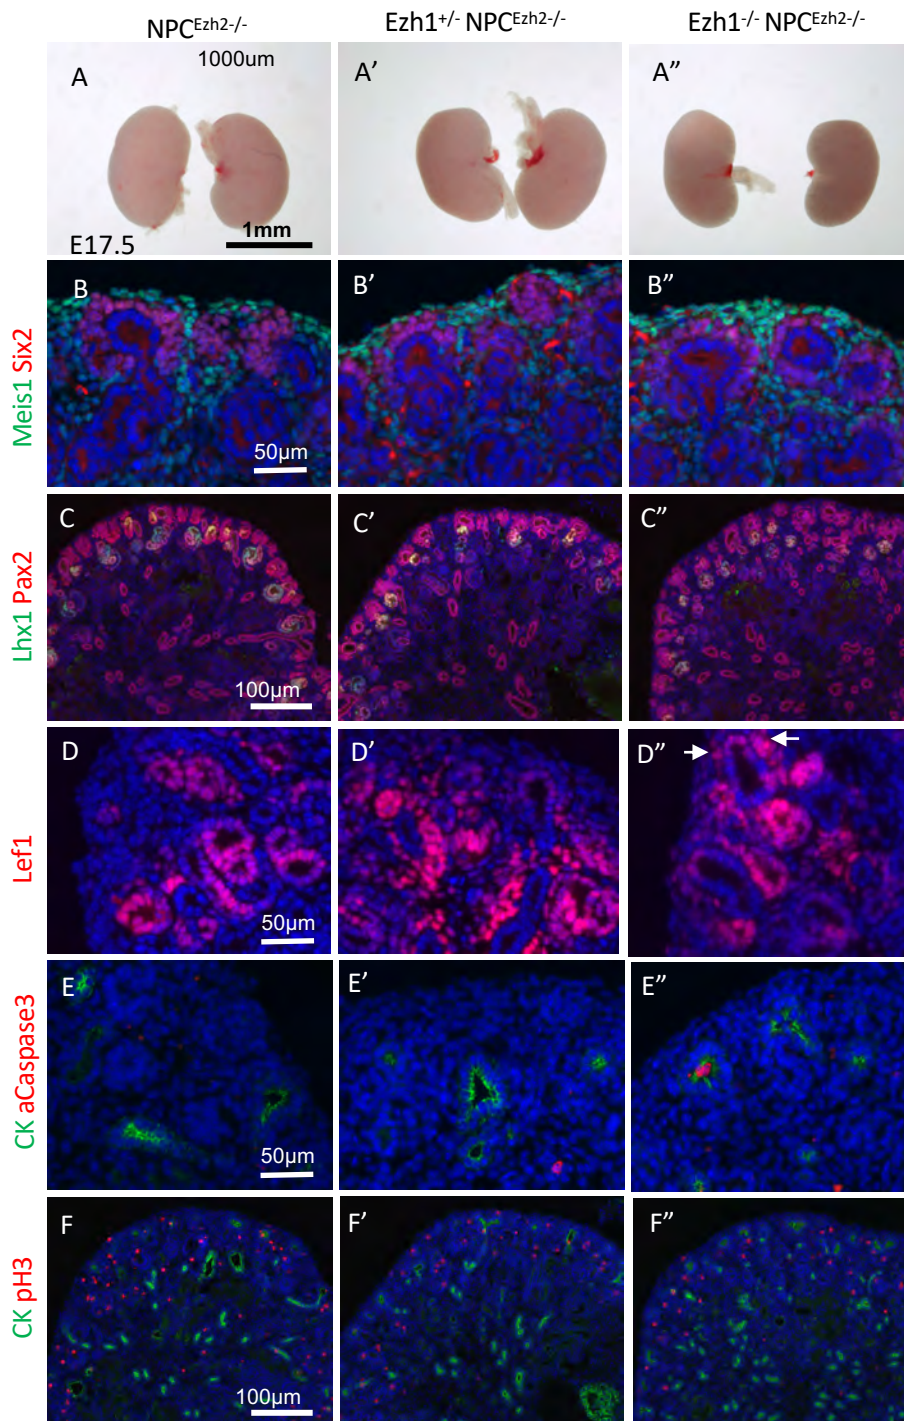

**Supplemental Fig. 4 (Fig. S-4). Effect of Ezh1 and Ezh2 inactivation on nephrogenesis at E17.5.** (A-A'') Gross morphology. (B-B'') Six2<sup>+</sup> cap mesenchyme is thinner in Ezh1/2 double mutant kidneys. (C-C'') Fewer Lhx1<sup>+</sup> nascent nephrons in double-mutant kidneys. (D-D'') Lef1, a canonical Wnt-target, is expressed prematurely in NPCs of double mutant kidneys (arrows). (E-E'') Active Caspase-3 staining (marker of apoptosis) is unaltered in Ezh1/2 mutant kidneys. (F-F'') Phospho-S10-H3 staining, a marker of dividing cells, is decreased in double mutant kidneys.

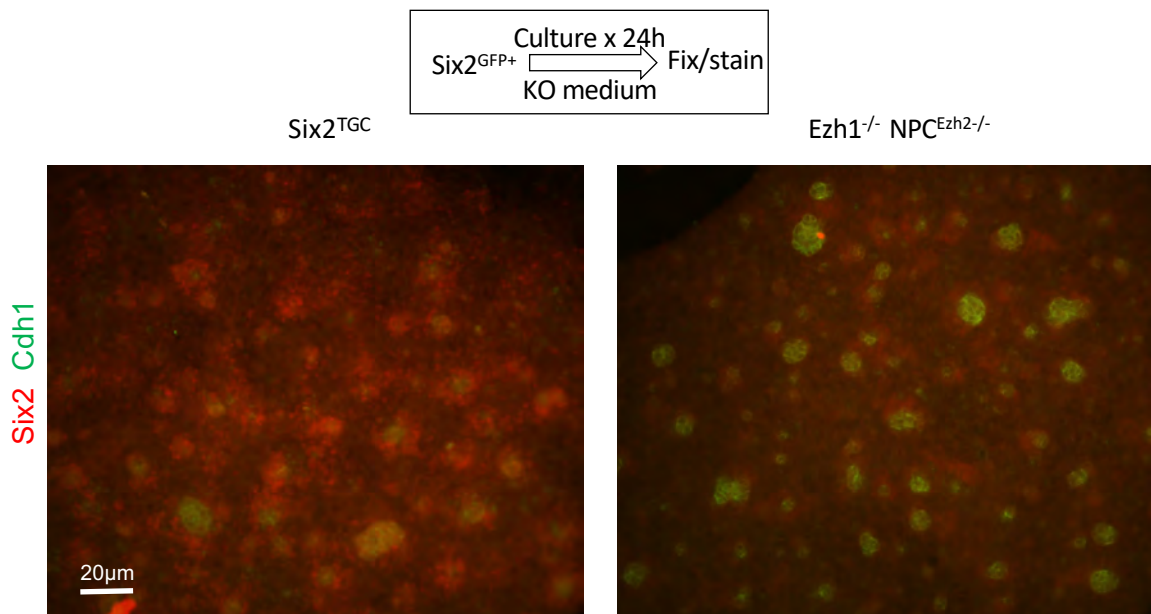

**Supplemental Fig. 5 (Fig. S-5). Inactivation of Ezh1 and Ezh2 promotes differentiation of cultured  $\text{Six2}^{\text{GFP}+}$  NPCs.** E16.5  $\text{Six2}^{\text{GFP}+}$  NPCs isolated from  $\text{Six2}^{\text{TGC}}$  (control) and  $\text{Ezh1}^{-/-}\text{Six2}^{\text{Ezh2}^{-/-}}$  kidneys were cultured for 24 hr in differentiation medium (see text) then stained with antibodies to Six2 and cell adhesion molecule E-cadherin.

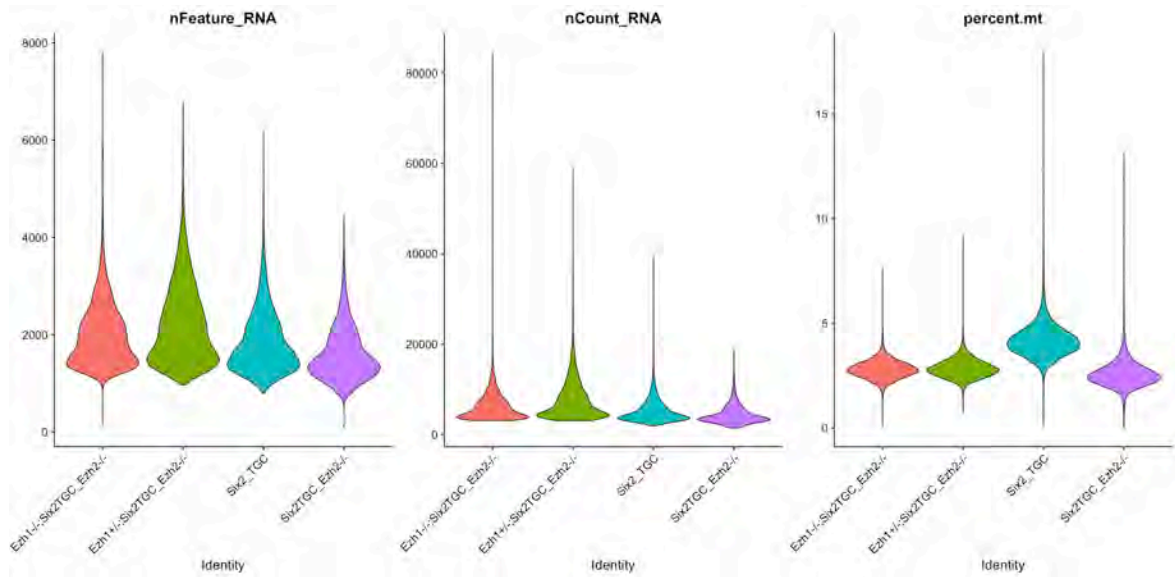

## Cell Counts before Sub-setting

```
table(Merged.ezh$orig.ident)
```

```

Six2_TGC          Six2TGC_Ezh2-/- Ezh1+/-;Six2TGC_Ezh2-/- Ezh1-/-;Six2TGC_Ezh2-/-
  10524                11382                7512                6574

```

## Cell Counts after Sub-setting

```

####[r]
Merged.ezh <- subset(Merged.ezh, subset = nFeature_RNA > 200 & nFeature_RNA < 5000 & percent.mt < 5) # default for nFeature_RNA <2500
####

```

```
> table(Merged.ezh$orig.ident)
```

```

Six2_TGC          Six2TGC_Ezh2-/- Ezh1+/-;Six2TGC_Ezh2-/- Ezh1-/-;Six2TGC_Ezh2-/-
  9258                11295                7455                6525

```

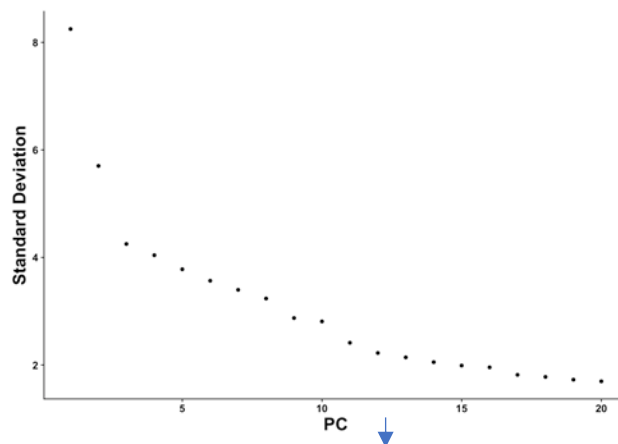

Supplemental Fig. 6 (Fig. S-6). Quality controls for scRNAseq studies.

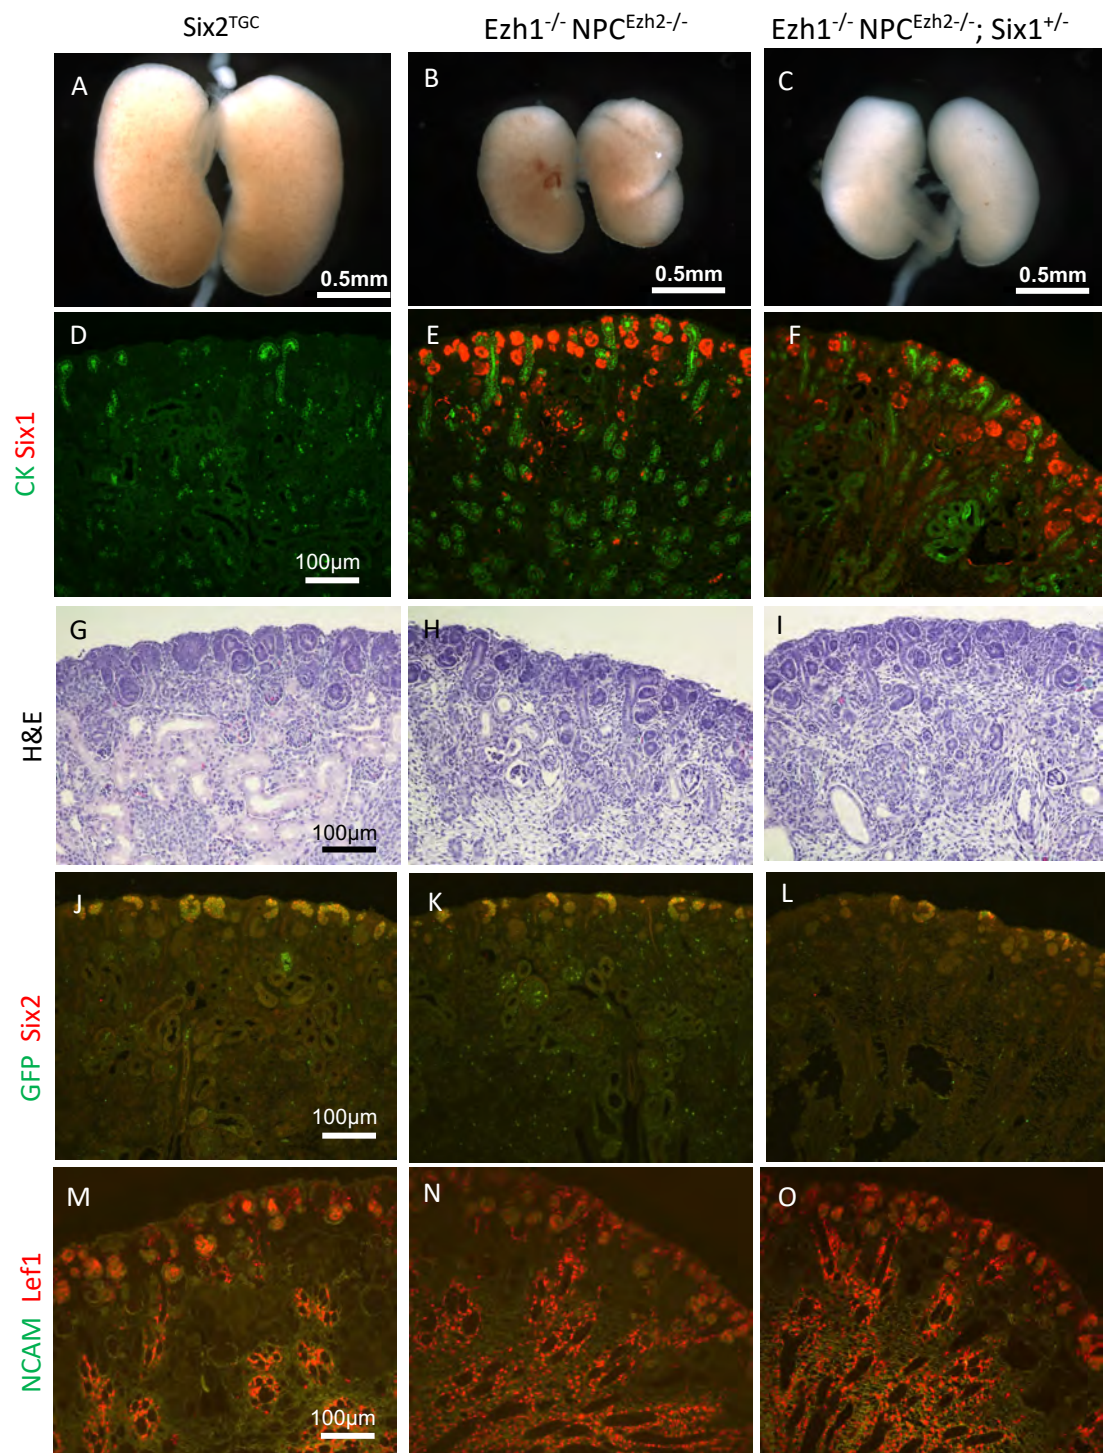

**Suppl. Fig. 7 (Fig. S-7). *Six1* gene-dosage reduction fails to restore nephrogenesis in *Ezh1*<sup>-/-</sup>*NPC*<sup>*Ezh2*<sup>-/-</sup></sup> NPCs.** (A-C) Gross view. (D-F) Section IF staining of Six1 and UB marker, cytokeratin, showing ectopic Six1 induction in *Ezh1*<sup>-/-</sup>*NPC*<sup>*Ezh2*<sup>-/-</sup></sup> NPCs and reduction of Six1 abundance in *Ezh1*<sup>-/-</sup>*NPC*<sup>*Ezh2*<sup>-/-</sup></sup>; *Six1*<sup>+/-</sup> NPCs. (J-O) Section H&E and IF staining illustrating that *Six1* gene-dosage reduction fails to restore *Six2* NPCs or nephrogenesis.
